# Supplementary material for: Delegating Innovation Projects with Deadline: Committed vs. Flexible Stopping
Source: Atypon-hosted journal article supplement (doi:10.1287/mnsc.2020.3800), 2021-01-18
Supplement: mnsc.2020.3800.sm3.xlsx [file mnsc.2020.3800.sm3.xlsx]

## Sheet: Client-side
Number	Q18 -The project we have worked on had hard deadline	Q18	Q9 - In projects we have outsourced to external providers, we took the first acceptable solution generated by the provider (if any)	Q9	Q7 - In projects we have outsourced to external providers, we took the best available solution (if any) when we ran out of time (reached the deadline)	Q7	Q5: The projects we have outsourced to external providers had pre-defined objectives	Q5			Respondent Profile [Role,Education,Experience,Industry]
1	Often	4	Often	4	Sometimes	3	Sometimes	3					0-3 years		Finance
2	Often	4	Rarely	2	Often	4	Often	4			Director of HR	Masters	more than 10 years		Transportation
3	Rarely	2	Often	4	Often	4	Often	4				Masters	more than 10 years		Education
4	Sometimes	3	Sometimes	3	Sometimes	3	Sometimes	3			Director of Operations	Undergraduate	more than 10 years	US Army	Other	Military
5	Often	4	Sometimes	3	Sometimes	3	Sometimes	3				Undergraduate	4-7 years		Other	Non-profit
6	Often	4	Sometimes	3	Sometimes	3	Often	4			Sales Executive, Strategic Development	Masters	more than 10 years		Transportation
7	Always	5	Sometimes	3	Often	4	Always	5					more than 10 years		Other	Retail
8	Sometimes	3	Rarely	2	Often	4	Sometimes	3				Masters	more than 10 years		Transportation
9	Often	4	Rarely	2	Often	4	Always	5					more than 10 years		Technology
10	Often	4	Rarely	2	Often	4	Often	4			HRIS Manager	Undergraduate	more than 10 years	Bird	Technology
11	Sometimes	3	Rarely	2	Rarely	2	Often	4			Senior Manager, CRM	Undergraduate	more than 10 years	The Home Depot	Marketing
12	Often	4	Sometimes	3	Often	4	Always	5			Director FP&A	Masters	more than 10 years		Manufacturing
13	Rarely	2	Rarely	2	Often	4	Sometimes	3			Senior financial analyst	Undergraduate	8-10 years		Technology
14	Often	4	Sometimes	3	Never	1	Always	5			Business Analyst	Undergraduate	more than 10 years		Manufacturing
15	Always	5	Sometimes	3	Often	4	Often	4			Operations Improvement Manager	Undergraduate	more than 10 years		Healthcare
16	Sometimes	3	Never	1	Sometimes	3	Rarely	2			Executive Administrator	Undergraduate	8-10 years	Atlanta Airlines Terminal Company	Other	Building Services
17	Often	4	Sometimes	3	Sometimes	3	Often	4				Masters	more than 10 years		Finance
18	Often	4	Rarely	2	Rarely	2	Always	5			Manager	Masters	more than 10 years		Software
19	Sometimes	3	Sometimes	3	Sometimes	3	Always	5			Director Data Platform Security	Masters	more than 10 years		Healthcare
20	Always	5	Never	1	Never	1	Always	5			Project Manager	Masters	more than 10 years		Technology
21	Always	5	Sometimes	3	Rarely	2	Sometimes	3			Director of Project Development	Undergraduate	more than 10 years	Haskell	Other	Engineering & Construction
22	Often	4	Sometimes	3	Often	4	Often	4				Undergraduate	more than 10 years		Finance
23	Sometimes	3	Rarely	2	Sometimes	3	Always	5					more than 10 years		Manufacturing
24	Sometimes	3	Sometimes	3	Sometimes	3	Sometimes	3			Securities Compliance Examiner	Masters	more than 10 years	SEC	Other
25	Always	5	Always	5	Sometimes	3	Always	5				Masters	more than 10 years		Healthcare
26	Always	5	Sometimes	3	Rarely	2	Always	5			Project Controls Manager	Undergraduate	more than 10 years	HJ Russell and Company	Other	Professional Services/Construciton Management
27	Often	4	Rarely	2	Never	1	Often	4			Controller	Masters	more than 10 years	SEDC	Technology
28	Often	4	Rarely	2	Rarely	2	Often	4			Principal Network Engineer	Masters	more than 10 years	Oracle Corp	Technology
29	Often	4	Often	4	Often	4	Always	5			Master Data Lead	Other	more than 10 years		Manufacturing
30	Sometimes	3	Sometimes	3	Often	4	Always	5			Sr Supplier Quality Engineer	Undergraduate	more than 10 years	United Technologies Corporatio	Manufacturing
31	Sometimes	3	Rarely	2	Rarely	2	Always	5			CFO	Undergraduate	more than 10 years		Other	Fertility
32	Sometimes	3	Rarely	2	Rarely	2	Often	4			Process Design & Improvement Lead	Masters	more than 10 years	Coca-Cola, Google	Technology
33	Often	4	Rarely	2	Often	4	Always	5			Product Engineer	Undergraduate	4-7 years		Technology
34	Sometimes	3	Sometimes	3	Sometimes	3	Rarely	2
35	Sometimes	3	Sometimes	3	Sometimes	3	Sometimes	3			Dir PMO	Masters	more than 10 years		Software
36	Always	5	Often	4	Always	5	Often	4			Program Manager	Masters	8-10 years	CodeMettle	Software
37	Always	5	Often	4	Never	1	Always	5				Masters	more than 10 years		Marketing
38	Often	4	Always	5	Always	5	Often	4			Sr. Consultant	Masters	more than 10 years		Technology
39	Often	4	Sometimes	3	Often	4	Often	4			North America Charging & Infrastructure Lead	Undergraduate	8-10 years	Mercedes-Benz USA	Technology
40	Often	4	Sometimes	3	Sometimes	3	Always	5					8-10 years		Healthcare
41	Often	4	Rarely	2	Rarely	2	Often	4			Sr. Management & Marketing Consultant	Undergraduate	more than 10 years	AT&T	Marketing
42	Always	5	Rarely	2	Often	4	Always	5			Engineer	Masters	4-7 years		Technology
43	Always	5	Rarely	2	Sometimes	3	Always	5			VP Platform Management and Innovation, Coca-Cola Freestyle	Masters	more than 10 years	The Coca-Cola Company	Technology
44	Always	5	Often	4	Rarely	2	Always	5			Sr. Manager of Products	Masters	more than 10 years	Siemens	Technology
45	Rarely	2	Never	1	Often	4	Sometimes	3			Data Analytics Scrum Master	Masters	more than 10 years		Technology
46	Always	5	Sometimes	3	Sometimes	3	Often	4				Undergraduate	more than 10 years		Technology
47	Often	4	Rarely	2	Rarely	2	Always	5			Program Manager	Undergraduate	more than 10 years		Technology
48	Often	4	Rarely	2	Sometimes	3	Often	4			VP Pharmacy Services	PhD (or equivalent)	more than 10 years	WellStar Health System	Healthcare
49	Often	4	Never	1	Sometimes	3	Often	4			Marketing Manager, North America	Masters	more than 10 years	Maytronics, makes of Dolphin robotic pool cleaners	Technology
50	Often	4	Often	4	Often	4	Sometimes	3				Masters	more than 10 years		Finance
51	Sometimes	3	Never	1	Often	4	Always	5				Undergraduate	4-7 years		Manufacturing
52	Rarely	2	Often	4	Often	4	Rarely	2			Account Manager	Undergraduate	4-7 years	Procurement Advisors	Other	Procurement Consulting Group for manufacturing groups
53	Sometimes	3	Rarely	2	Often	4	Often	4				Masters	more than 10 years		Finance
54	Often	4	Sometimes	3	Sometimes	3	Often	4				Masters	more than 10 years		Finance
55	Often	4	Never	1	Rarely	2	Often	4
56	Sometimes	3	Rarely	2	Sometimes	3	Sometimes	3
57	Often	4	Rarely	2	Rarely	2	Sometimes	3
58	Often	4	Often	4	Sometimes	3	Always	5			Sr Principal Eng	PhD (or equivalent)	more than 10 years		Technology
59	Often	4	Sometimes	3	Always	5	Often	4			Assistant Professor	PhD (or equivalent)	4-7 years		Education
60	Often	4	Sometimes	3	Always	5	Often	4				Masters	more than 10 years		Technology
61	Often	4	Sometimes	3	Rarely	2	Sometimes	3				Masters	more than 10 years		Other	Consumer Goods
62	Rarely	2	Rarely	2	Rarely	2	Often	4
63	Often	4	Sometimes	3	Often	4	Often	4				Masters	more than 10 years		Manufacturing
64	Sometimes	3	Rarely	2	Always	5	Always	5			Architect and Lead	Masters	more than 10 years		Technology
65	Often	4	Rarely	2	Often	4	Always	5				Masters	more than 10 years		Healthcare
66	Always	5	Sometimes	3	Rarely	2	Always	5			Deputy Chief Information Officer	Masters	more than 10 years		Other	Government Administration
67	Always	5	Rarely	2	Always	5	Always	5			IT Manager	Masters	more than 10 years		Technology
68	Often	4	Rarely	2	Often	4	Always	5			Managing Director	PhD (or equivalent)	4-7 years		Technology
69	Often	4	Often	4	Often	4	Rarely	2				Masters	more than 10 years		Finance
70	Often	4	Sometimes	3	Often	4	Often	4			CEO	Masters	more than 10 years	ATP, Emnovate, MUFG, Putnam, GWLA, Global Aviation	Software
71	Often	4	Sometimes	3	Sometimes	3	Always	5			SENIOR DESIGN ENGINEER	PhD (or equivalent)	8-10 years		Technology
72	Often	4	Sometimes	3	Sometimes	3	Always	5			Consultant	Masters	8-10 years		Technology
73	Often	4	Rarely	2	Sometimes	3	Always	5			SVP & Chief Strategy OFficer	Masters	more than 10 years	Texas Health Resources	Healthcare
74	Often	4	Rarely	2	Sometimes	3	Often	4				Masters	more than 10 years		Healthcare
75	Sometimes	3	Sometimes	3	Sometimes	3	Sometimes	3			Product Manager - MBA Intern	Undergraduate	4-7 years	ADP	Technology
76	Rarely	2	Rarely	2	Often	4	Often	4			Product design and development engineer	Masters	0-3 years	Tensar International Corporation	Transportation
77	Always	5	Rarely	2	Never	1	Never	1				Masters	0-3 years	AGCO	Manufacturing
78	Rarely	2	Rarely	2	Often	4	Sometimes	3			Head of Mobile	Masters	more than 10 years		Finance
79	Sometimes	3	Often	4	Often	4	Always	5				Masters	more than 10 years		Manufacturing
80	Always	5	Sometimes	3	Sometimes	3	Sometimes	3			LOD1 Operations Risk and Control Analyst	Undergraduate	0-3 years	SunTrust Bank	Finance
81	Always	5	Rarely	2	Sometimes	3	Always	5			Owner	Masters	more than 10 years		Finance
82	Sometimes	3	Sometimes	3	Sometimes	3	Rarely	2			Sr Process Engineer	PhD (or equivalent)	more than 10 years		Design

## Sheet: Provider-side
Number	Q12 - The project we have worked on had hard deadline	Q12	Q68 – As we got closer to deadline without success, we changed our approach	Q68	Q69 – How did you change your approach? Select all that apply	Q20 - In projects we had worked on, clients requested additional solution(s) even after we reached what we thought was an agreement (initial set objective)	Q20	Q19 - The projects we have worked on had pre-defined objectives	Q19	Q47- Consider your most recent project. What is the LEAST amount of time you (or your team) spent on the project in any given week? (Please enter your answer in man-hours)	Q50 - Consider your most recent project. What is the MOST amount of time you (or your team) spent on the project in any given week? (Please enter your answer in man-hours)			Respondent Profile [Role,Education,Experience,Industry]
1	Sometimes	3	Sometimes	3	Changed our technical approach	Sometimes	3	Sometimes	3							0-3 years		Finance
2	Sometimes	3	Often	4	Added different skills to the team,Increased the intensity of efforts	Sometimes	3	Often	4	10	30				Undergraduate	more than 10 years		Finance
3	Sometimes	3	Sometimes	3	Added more team members					6	25				Undergraduate	4-7 years		Other	Non-profit
4	Often	4	Rarely	2	Increased the intensity of efforts	Sometimes	3	Always	5	3	5				Undergraduate	8-10 years		Technology
5	Often	4	Sometimes	3	Changed our technical approach	Rarely	2	Often	4	6	80			Sr. Account Manager	Undergraduate	more than 10 years	Procurement Advisors LLC	Other	Consulting - Supply Chaing - Procurement
6	Sometimes	3	Sometimes	3	Changed our technical approach,Increased the intensity of efforts			Often	4	20	50				Masters	more than 10 years		Transportation
7	Always	5	Often	4	Added more team members,Added different skills to the team,Changed our technical approach,Increased the intensity of efforts	Always	5	Always	5	15	100					more than 10 years		Technology
8	Often	4	Often	4	Added different skills to the team,Changed our technical approach,Increased the intensity of efforts	Often	4	Always	5	3	12			Operations, Change Management Leader	Undergraduate	4-7 years	Ameris Bank Corp	Finance
9	Sometimes	3	Rarely	2	Changed our technical approach,Increased the intensity of efforts	Sometimes	3	Often	4	1	20			Application Engineer and Auto Industry Speciaiist	Undergraduate	more than 10 years	ZwickRoell LP	Other	Industrial Equipment
10	Sometimes	3	Sometimes	3	Added more team members,Changed our technical approach,Increased the intensity of efforts	Sometimes	3	Often	4	12	50			VP Strategic Partnerships	Undergraduate	more than 10 years	Webbula Data Solutions	Technology
11	Often	4	Always	5	Added more team members,Added different skills to the team,Changed our technical approach	Sometimes	3	Always	5	12	40			Data & Analytics Senior Manager	Masters	more than 10 years	Accenture	Software
12	Often	4	Sometimes	3	Changed our technical approach	Sometimes	3	Often	4	16	60			HRIS Manager	Undergraduate	more than 10 years	Bird	Technology
13	Always	5	Often	4	Added more team members	Often	4	Always	5	40	80			Senior financial analyst	Undergraduate	8-10 years		Technology
14	Sometimes	3	Often	4	Added more team members,Added different skills to the team,Changed our technical approach	Often	4	Often	4	20	100				Masters	more than 10 years		Finance
15	Often	4	Often	4	Changed our technical approach	Sometimes	3	Often	4	5	50			Manager	Masters	more than 10 years		Software
16	Always	5	Often	4	Added more team members,Changed our technical approach,Increased the intensity of efforts	Sometimes	3	Always	5	40	60			Director Data Platform Security	Masters	more than 10 years		Healthcare
17	Rarely	2	Always	5	Added more team members,Added different skills to the team,Increased the intensity of efforts	Often	4	Sometimes	3	40	100			Client Success Account Manager	Undergraduate	more than 10 years		Technology
18	Always	5	Sometimes	3	Added more team members					15	20			Project Manager	Masters	more than 10 years		Technology
19	Always	5	Often	4	Increased the intensity of efforts	Always	5	Sometimes	3	8	60			Director of Project Development	Undergraduate	more than 10 years	Haskell	Other	Engineering & Construction
20	Always	5	Sometimes	3	Added more team members,Added different skills to the team,Changed our technical approach,Increased the intensity of efforts	Always	5	Often	4	2	72			Sr.Program Manager	Undergraduate	more than 10 years	Opentext	Technology
21	Often	4	Sometimes	3	Added different skills to the team	Rarely	2	Often	4	30	60				Undergraduate	more than 10 years		Finance
22	Sometimes	3	Sometimes	3	Changed our technical approach,Increased the intensity of efforts	Often	4	Often	4	40	100					more than 10 years		Manufacturing
23	Often	4	Sometimes	3	Added more team members,Increased the intensity of efforts	Sometimes	3	Often	4	5	20			project manager	Undergraduate	more than 10 years		Software
24	Rarely	2	Sometimes	3	Added more team members,Changed our technical approach	Sometimes	3	Sometimes	3	20	75			Securities Compliance Examiner	Masters	more than 10 years	SEC	Other
25	Often	4	Sometimes	3	Added more team members,Changed our technical approach	Always	5	Always	5	20	80				Masters	more than 10 years		Healthcare
26	Always	5	Always	5	Added different skills to the team,Changed our technical approach,Increased the intensity of efforts	Sometimes	3	Always	5	60	80			Professor	PhD (or equivalent)	8-10 years		Technology
27	Always	5	Sometimes	3	Added more team members,Added different skills to the team,Increased the intensity of efforts	Sometimes	3	Always	5	4	40			Project Controls Manager	Undergraduate	more than 10 years	HJ Russell and Company	Other	Professional Services/Construciton Management
28	Always	5	Often	4	Added more team members,Added different skills to the team,Increased the intensity of efforts	Never	1	Always	5	5	10			Controller	Masters	more than 10 years	SEDC	Technology
29	Always	5	Sometimes	3	Added different skills to the team,Increased the intensity of efforts	Sometimes	3	Always	5	40	60			Principal Network Engineer	Masters	more than 10 years	Oracle Corp	Technology
30	Often	4	Rarely	2	Other	Sometimes	3	Often	4	50	45			Master Data Lead	Other	more than 10 years		Manufacturing
31	Often	4	Sometimes	3	Changed our technical approach,Increased the intensity of efforts	Sometimes	3	Rarely	2	40	60			SQL DBA	Undergraduate	more than 10 years		Technology
32	Often	4	Sometimes	3	Added more team members,Changed our technical approach,Increased the intensity of efforts	Sometimes	3	Always	5	5	50			Sr Supplier Quality Engineer	Undergraduate	more than 10 years	United Technologies Corporatio	Manufacturing
33	Always	5	Sometimes	3	Added more team members	Rarely	2	Sometimes	3	25	40			Director	Masters	more than 10 years	Duff & Phelps	Finance
34	Sometimes	3	Sometimes	3	Added more team members,Added different skills to the team,Changed our technical approach,Increased the intensity of efforts	Sometimes	3	Often	4	80	20			CFO	Undergraduate	more than 10 years		Other	Fertility
35	Always	5	Sometimes	3	Changed our technical approach,Increased the intensity of efforts,Other	Often	4	Often	4	15	100			Operations Officer	Undergraduate	more than 10 years		Other	Military
36	Often	4	Often	4	Changed our technical approach	Rarely	2	Often	4	40	80			Process Design & Improvement Lead	Masters	more than 10 years	Coca-Cola, Google	Technology
37	Always	5	Sometimes	3	Added different skills to the team,Changed our technical approach,Increased the intensity of efforts	Rarely	2	Always	5	20	40			Product Engineer	Undergraduate	4-7 years		Technology
38	Sometimes	3	Sometimes	3	Added more team members	Sometimes	3	Rarely	2	20	40
39	Always	5	Sometimes	3	Added different skills to the team	Sometimes	3	Often	4	4	40				Undergraduate	more than 10 years		Technology
40	Sometimes	3	Sometimes	3	Added more team members,Added different skills to the team,Changed our technical approach,Increased the intensity of efforts	Sometimes	3	Sometimes	3	100				Dir PMO	Masters	more than 10 years		Software
41	Often	4	Rarely	2	Added more team members,Increased the intensity of efforts	Always	5	Often	4	20	80			Program Manager	Masters	8-10 years	CodeMettle	Software
42	Never	1	Never	1		Never	1	Never	1	20	50			Founder, owner, Salient Counseling	Masters	more than 10 years	Salient Counseling (private practice)	Personal Services
43	Sometimes	3	Rarely	2	Increased the intensity of efforts	Always	5	Often	4	1	10			Enterprise Account Manager	Masters	8-10 years	Feedonomics	Software
44	Always	5	Always	5	Changed our technical approach	Always	5	Often	4	10	38			Sr. Consultant	Masters	more than 10 years		Technology
45	Sometimes	3	Always	5	Added more team members,Added different skills to the team,Changed our technical approach,Increased the intensity of efforts,Other	Sometimes	3	Often	4	1	5			North America Charging & Infrastructure Lead	Undergraduate	8-10 years	Mercedes-Benz USA	Technology
46	Sometimes	3	Often	4	Added different skills to the team,Changed our technical approach	Often	4	Often	4	10	25					8-10 years		Healthcare
47	Often	4	Sometimes	3	Increased the intensity of efforts	Sometimes	3	Sometimes	3	90	75			Sr. Management & Marketing Consultant	Undergraduate	more than 10 years	AT&T	Marketing
48	Always	5	Sometimes	3	Changed our technical approach	Often	4	Always	5	60	70			Engineer	Masters	4-7 years		Technology
49	Always	5	Often	4	Added more team members,Changed our technical approach,Increased the intensity of efforts,Other	Often	4	Always	5	100	100			VP Platform Management and Innovation, Coca-Cola Freestyle	Masters	more than 10 years	The Coca-Cola Company	Technology
50	Always	5	Often	4	Added different skills to the team,Changed our technical approach	Often	4	Always	5	40	100			Sr. Manager of Products	Masters	more than 10 years	Siemens	Technology
51	Always	5	Sometimes	3	Added different skills to the team,Changed our technical approach	Often	4	Always	5						Undergraduate	more than 10 years		Technology
52	Sometimes	3	Sometimes	3	Added more team members,Added different skills to the team,Changed our technical approach,Increased the intensity of efforts,Other	Sometimes	3	Sometimes	3	8	20			Program Manager	Undergraduate	more than 10 years		Technology
53	Sometimes	3	Sometimes	3	Changed our technical approach	Sometimes	3	Often	4	1	80			Marketing Manager, North America	Masters	more than 10 years	Maytronics, makes of Dolphin robotic pool cleaners	Technology
54	Often	4	Often	4	Added more team members,Added different skills to the team,Changed our technical approach,Increased the intensity of efforts	Sometimes	3	Often	4	5	10				Masters	more than 10 years		Finance
55	Often	4	Rarely	2	Added more team members,Changed our technical approach	Often	4	Always	5						Undergraduate	more than 10 years		Technology
56	Sometimes	3	Rarely	2	Added more team members	Always	5	Often	4	90	90				Undergraduate	4-7 years		Manufacturing
57	Rarely	2	Often	4	Increased the intensity of efforts	Often	4	Often	4	25	100			Account Manager	Undergraduate	4-7 years	Procurement Advisors	Other	Procurement Consulting Group for manufacturing groups
58	Often	4	Often	4	Added different skills to the team,Changed our technical approach,Increased the intensity of efforts	Often	4	Always	5	1	1				Masters	more than 10 years		Finance
59	Often	4	Often	4	Added more team members,Added different skills to the team	Often	4	Often	4	30	50			Sr Director	Masters	more than 10 years	OFS	Technology
60	Always	5	Always	5	Added more team members	Often	4	Often	4	1	60
61	Sometimes	3	Often	4	Changed our technical approach
62	Often	4	Often	4	Increased the intensity of efforts
63	Rarely	2	Often	4	Changed our technical approach
64	Sometimes	3				Sometimes	3	Often	4	5	40			Account Manager	Undergraduate	0-3 years		Manufacturing
65	Often	4				Always	5	Often	4	40	60				Masters	more than 10 years		Technology
66	Sometimes	3				Often	4	Often	4	20	60				Masters	more than 10 years		Other	Consumer Goods
67	Often	4				Always	5	Always	5	24	35
68	Sometimes	3				Sometimes	3	Always	5	32	40			Architect and Lead	Masters	more than 10 years		Technology
69	Always	5				Always	5	Often	4	30	50			IT Manager	Masters	more than 10 years		Technology
70	Often	4				Often	4	Often	4	24	80			Principal UX Designer	Masters	more than 10 years	Backbase	Software
71	Often	4				Sometimes	3	Often	4	15	50			Managing Director	PhD (or equivalent)	4-7 years		Technology
72	Often	4				Always	5	Always	5	40	60			Team Lead - Asset Performance	Masters	4-7 years	INTECH Process Automation	Technology
73	Often	4				Sometimes	3	Often	4	5	16			CEO	Masters	more than 10 years	ATP, Emnovate, MUFG, Putnam, GWLA, Global Aviation	Software
74	Sometimes	3				Rarely	2	Often	4	1	20			Systems Engineer	Masters	more than 10 years	Department of Defense	Technology
75	Often	4				Often	4	Always	5	2	10			Project Manager/Team lead	Undergraduate	4-7 years		Software
76	Often	4				Sometimes	3	Always	5	30	40			Consultant	Masters	8-10 years		Technology
77	Sometimes	3				Rarely	2	Rarely	2	24	40				Masters	more than 10 years		Healthcare
78	Sometimes	3				Often	4	Often	4	30	65			Business Analyst	Undergraduate	0-3 years	Deloitte Consulting	Other	Consulting
79	Often	4				Often	4	Often	4	8	30				Undergraduate	4-7 years		Software
80	Often	4				Often	4	Sometimes	3	10	80				Undergraduate	4-7 years		Healthcare
81	Often	4				Rarely	2	Rarely	2	8	16				PhD (or equivalent)	4-7 years	amazon lab 126	Technology
82	Always	5				Sometimes	3	Always	5	48	65			MTS Scientist II	Undergraduate	4-7 years	Immucor, Inc.	Manufacturing
83	Often	4				Always	5	Always	5	40	100			Product Manager - MBA Intern	Undergraduate	4-7 years	ADP	Technology
84	Sometimes	3				Sometimes	3	Often	4	1	40
85	Sometimes	3				Sometimes	3	Sometimes	3	10	100			EVP, Operations	Masters	more than 10 years	Moxie, Zenith & MRY	Marketing
86	Often	4				Rarely	2	Often	4	20	48				Masters	more than 10 years		Manufacturing
87	Often	4				Often	4	Always	5	75	40			Chief Growth Officer	Undergraduate	8-10 years	Evolution Tech Group Inc	Technology
88	Often	4				Often	4	Sometimes	3	45	65			Senior Consultant	Masters	0-3 years	Ascent Consulting	Other	Construction
89	Always	5				Often	4	Always	5	1	50			Owner	Masters	more than 10 years		Finance
90	Always	5				Sometimes	3	Often	4	40	60			Big Data Consultant	Masters	more than 10 years	Accenture	Technology
														Sr Process Engineer	PhD (or equivalent)	more than 10 years		Design
